# Supplementary material for: Isolation of a novel orthobunyavirus from bat flies (Eucampsipoda africana)
Source: PubMed Central journal article supplement (PMC5656801; doi:10.1099/jgv.0.000753), 2017-05-11
Supplement: jgv-98-935-s001.pdf [file jgv-98-935-s001.pdf]

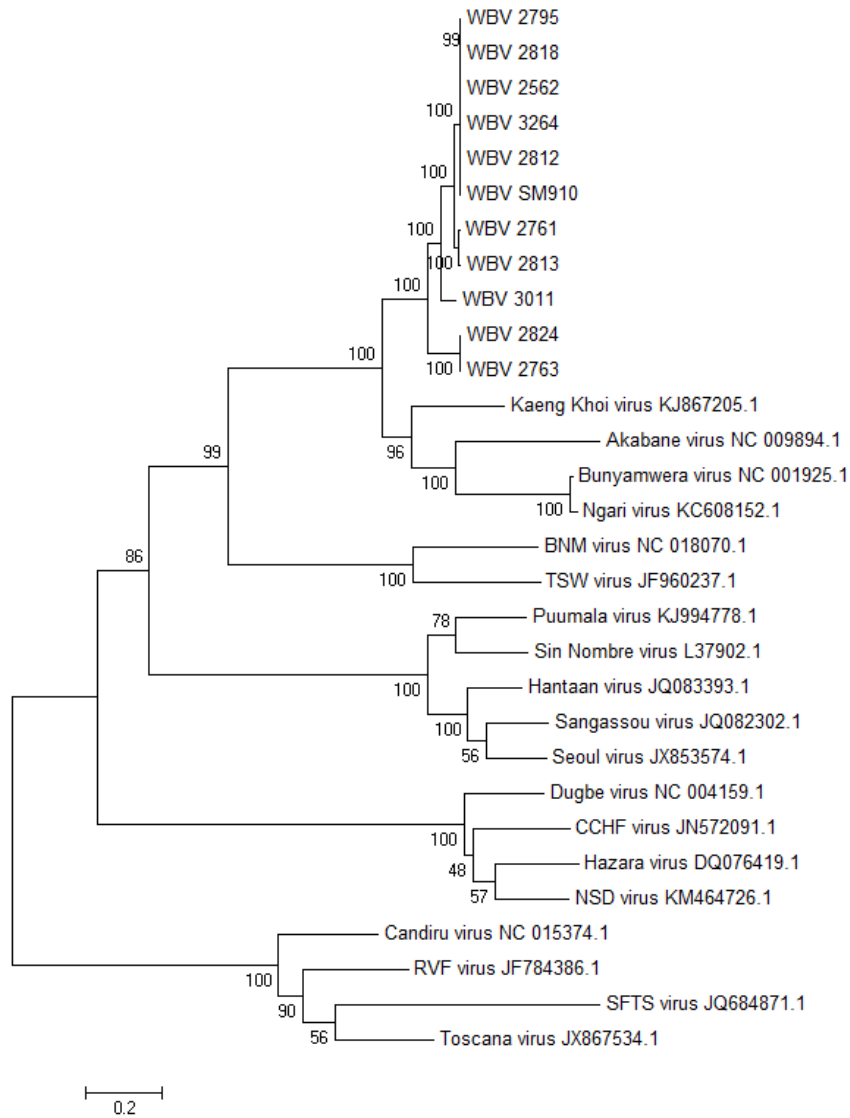

**S1.** Molecular phylogenetic analysis by the Maximum Likelihood method showing representative viruses from different genera in the *Bunyaviridae* family using large (L) segment nucleic acid sequences. Genbank accession numbers are indicated next to virus names (excluding WBV for which accession numbers are provided in Table 1).

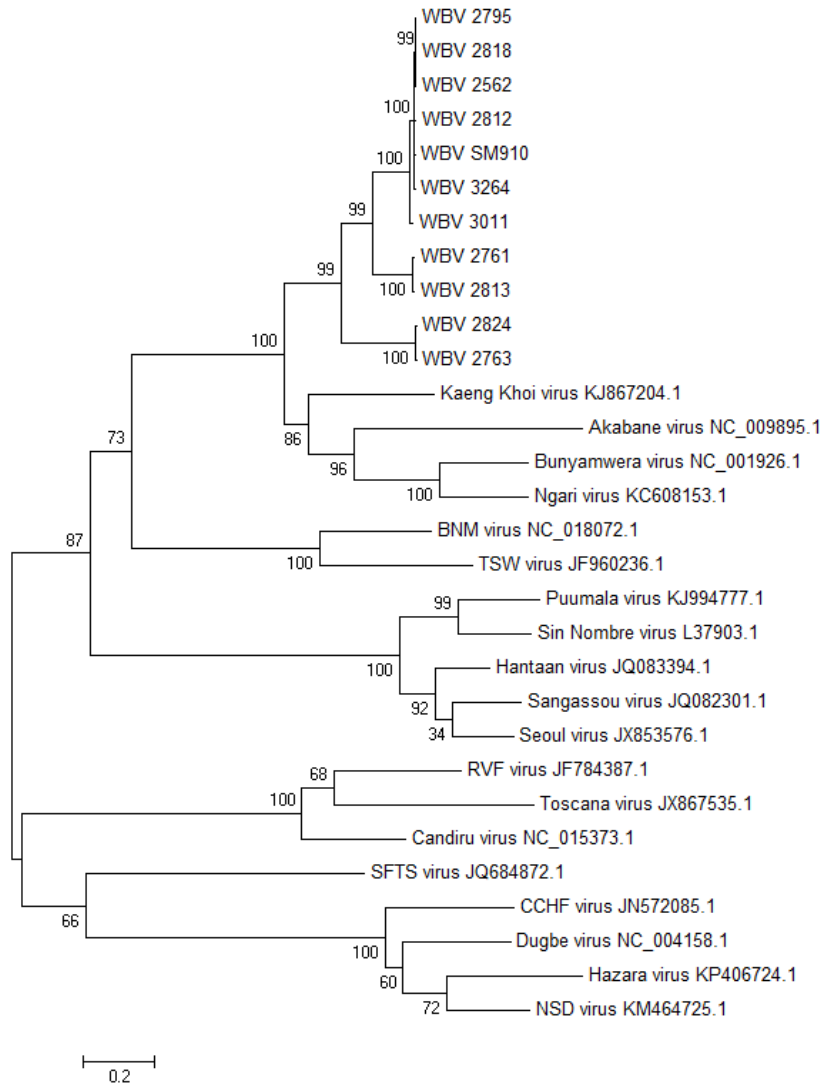

**S2.** Molecular phylogenetic analysis by the Maximum Likelihood method showing representative viruses from different genera in the *Bunyaviridae* family using medium (M) segment nucleic acid sequences. Genbank accession numbers are indicated next to virus names (excluding WBV for which accession numbers are provided in Table 1).

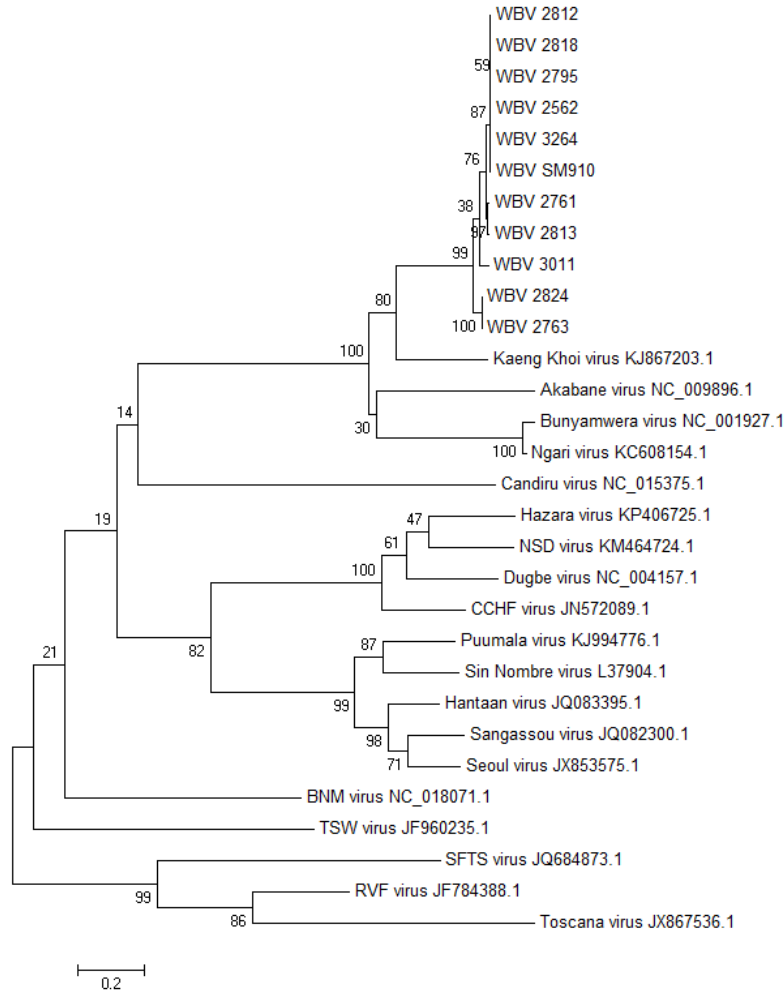

**S3.** Molecular phylogenetic analysis by the Maximum Likelihood method showing representative viruses from different genera in the *Bunyaviridae* family using small (S) segment nucleic acid sequences. Genbank accession numbers are indicated next to virus names (excluding WBV for which accession numbers are provided in Table 1).
